# Supplementary material for: Collagen-Based Mechanical Anisotropy of the Tectorial Membrane: Implications for Inter-Row Coupling of Outer Hair Cell Bundles
Source: PLoS One. 2009 Mar 18;4(3):e4877. doi: 10.1371/journal.pone.0004877 (PMC2654110; doi:10.1371/journal.pone.0004877)
Supplement: Supporting Information S2 — (0.05 MB DOC) [file pone.0004877.s006.doc]

**Supporting information S2. Derivation of other mechanical quantities.**

**1. Derivation of the effective Young’s modulus Eeff for a transversely isotropic material with a single family of fibers.**

Consider the surface z-displacement w(x,y,0) produced by a point force F acting at the origin and normal to the surface defined by the plane (x,y,0) of a transversely isotropic half-space, with fibers aligned in the y-direction. This corresponds to the G33 component ofthe surface Green’s tensor defined in Chadwick et al. (2004). For the case of large fiber modulus Ef compared to the shear modulus *T*, the asymptotic form of G33 is

A2-1

For an isotropic material the result is simply

A2-2

Equating the mean values of G33 from A2-1 and A2-2 at a distance *r* yields

A2-3

For an incompressible isotropic material the effective Young’s modulus Eeff = 3eff.

**2. Derivation of shear wave speed formula for a transversely isotropic material with a single family of fibers.**

Consider displacements (u,v) and pressure p in the (x,y) plane, with fibers aligned in the y-direction. The dynamic equations of motion (Chadwick et al. 2004) are simplified for motion independent of z:

A1-1

A1-2

A1-3

where  is the density and the three elastic moduli have been defined in the text. Substitution of

A1-4

for a wave with wavenumber yields the homogeneous linear algebraic system:

A1-5

which has a solution only if the determinant of the matrix of coefficients is zero. Setting the determinant to zero yields the dispersion relation:

A1-6

Introduce the propagation direction measuredwith respect to the x-direction

which yields the shear wavespeed *c()*:

A1-7
